1 **Factors contributing to the disease ecology of brown crab (*Cancer pagurus*) in a**  
2 **temperate marine protected area.**

3

4 Charlotte E. Davies<sup>1\*</sup>, Andrew F. Johnson<sup>2,3</sup>, Emma C. Wootton<sup>1,4</sup>, Spencer J. Greenwood<sup>5</sup>,  
5 K. Fraser Clark<sup>6</sup>, Claire L. Vogan<sup>7</sup> and Andrew F. Rowley<sup>1</sup>

6

7 <sup>1</sup> Department of Biosciences, College of Science, Swansea University, Swansea, SA2 8PP,  
8 UK

9 <sup>2</sup> MarFishEco Fisheries Consultants, Edinburgh, United Kingdom

10 <sup>3</sup> The Lyell Centre, Institute of Life and Earth Sciences, School of Energy, Geoscience,  
11 Infrastructure and Society, Heriot-Watt University, Edinburgh EH14 4AS, UK

12 <sup>4</sup> Consultant ecologist, Pembrokeshire, Wales, UK.

13 <sup>5</sup> Department of Biomedical Sciences and AVC Lobster Science Centre, Atlantic Veterinary  
14 College, University of Prince Edward Island, 550 University Avenue, Charlottetown, Prince  
15 Edward Island C1A 4P3, Canada

16 <sup>6</sup> Department of Animal Sciences and Aquaculture, Faculty of Agriculture, Dalhousie  
17 University, 58 Sipu Awti, Bible Hill, NS B2N 5E3, Canada

18 <sup>7</sup> College of Medicine, Swansea University, Swansea, SA2 8PP, UK

19 \*Author for correspondence: [CEDavies72@gmail.com](mailto:CEDavies72@gmail.com)

20

21

22 **Running page head: Disease ecology in a marine protected area**

23 **ABSTRACT**

24 Marine ecosystems are affected by multiple, well-known stressors like fishing and climate  
25 change, but a less documented concern is disease. Marine reserves have been successful in  
26 replenishing stocks and aiding recruitment but studies have shown that high population  
27 abundances in marine reserves may lead to unwanted secondary effects such as increase in  
28 predators and competition, altering trophic webs, and disease. Here, we investigate factors  
29 contributing to disease prevalence in a brown crab (*Cancer pagurus*) population around  
30 Lundy Island (the UK's first MPA) after 7 years of no-take protection. Population parameters  
31 (size, sex, and abundance), disease (shell disease, *Hematodinium* spp. infection) and injury  
32 presence (a known precursor to some disease conditions) were assessed over two years in  
33 both fished and unfished areas of the MPA. We found no significant difference in prevalence  
34 between the disease prevalence in fished and unfished areas, however overall, the number of  
35 injured crabs increased significantly over the two years (12%), as did the prevalence of shell  
36 disease (15%). The probability of crabs having shell disease increased significantly in male  
37 crabs, and in those missing limbs. The probability of crabs being injured increased  
38 significantly in crabs below the minimum landing size. In terms of population parameters,  
39 crabs were more prevalent in the fished area compared to the unfished area, thought to be a  
40 result of an increase in the predatory European lobster. The findings of the present study  
41 highlight potential secondary community changes as a result of MPA implementation.  
42 Therefore, surveillance for such changes, as part of MPA management, would provide useful  
43 information on the health and overall function of the protected ecosystem.

44

45 **Key Words:**

46 Crustacean fisheries, disease ecology, endoparasites, marine conservation zone, marine  
47 management, monitoring, no take zone, population density, dinoflagellates

## 48 INTRODUCTION

49 Numerous commercial fish stocks have been overexploited and many continue to be  
50 fished at unsustainable levels (Jackson et al. 2001, Steadman et al. 2014). This is leading to  
51 both a loss of biodiversity and significant concerns for global food security (Pauly et al. 2005,  
52 Worm et al. 2009). Conservation areas in marine ecosystems, such as marine protected areas  
53 (MPAs) are one management tool that can be used to help reduce fished species decline, aid  
54 in stock replenishment and conserve habitats of special interest (Halpern & Warner, 2002,  
55 Aburto-Oropeza et al. 2011).

56 Closure of areas to fishing may, however, result in secondary effects such as  
57 overpopulation of a species, in turn altering natural local community compositions (Leo &  
58 Micheli 2015, Wood & Lafferty 2015). In some protected areas, changes in species  
59 assemblages and population abundance have been shown to have negative effects due to  
60 overcrowding such as disease increase, reduction in habitats and change in food web structure  
61 due to changes in competition or predation rates (Lebarbenchon et al. 2006, Wootton et al.  
62 2012, Wood et al. 2013, Christianen et al. 2014). With increased abundance comes an  
63 increase in both conspecific (within species) and heterospecific (between species) interactions,  
64 which can result in injury and limb loss in individuals, contributing to disease in some species  
65 (Davies et al. 2015). Disease can influence community composition, age distributions, trophic  
66 interactions and biotic structure within a population (Harvell et al. 2002). In some cases,  
67 disease is also thought to be exacerbated by the emerging threat of climate change (Burge et  
68 al. 2014, Maynard et al. 2016) and can be a useful indicator of ecosystem health (Harvell et al.  
69 1999). The prevalence and distribution of pathogens and disease in marine ecosystems is  
70 growing globally (Ward & Lafferty 2004), has been reported across a wide range of taxa over  
71 the past three decades (Harvell et al. 2004) and is seen as an often neglected, but emerging  
72 field (Lafferty & Hofmann 2016).

73 *Cancer pagurus*, the edible or brown crab, is an important European fisheries species,  
74 with global landings of over 32,000 tonnes in 2014. This species is, however, susceptible to a  
75 range of pathogens (Stentiford 2008), the most documented of which, that have been known  
76 to cause significant economic and population losses, are pink crab disease and ‘black spot’ or  
77 shell disease. Pink crab disease, in some species referred to as bitter crab disease, is caused  
78 by the endoparasitic dinoflagellate, *Hematodinium* spp., named as such because of the  
79 hyperpigmentation and bitter taste exhibited by some heavily infected species (Wilhelm &  
80 Mialhe 1996, Stentiford et al. 2002, Ryazanova 2008). Chatton & Poisson (1931) first  
81 reported the disease in France in both harbour *Liocarcinus depurator* and shore crabs  
82 *Carcinus maenas*. It has since been found to infect over 40 species of decapod crustaceans  
83 worldwide, and because infected animals become unmarketable due to poor muscle quality,  
84 *Hematodinium* spp. infections have had huge economic impacts on commercial fisheries  
85 (Field et al. 1992, Wilhelm & Mialhe 1996, Shields et al. 2005, Stentiford & Shields 2005).

86 ‘Black spot’ or ‘Burn Spot’ disease, herein referred to as shell disease, is  
87 characterised by melanised lesions that can progress to erode through the carapace, exposing  
88 underlying soft tissues in the infected individual (Vogan et al. 2008). Mortality occurs due to  
89 secondary infection by opportunistic bacteria (Baross et al. 1978, Vogan & Rowley 2002), or  
90 during a moult if old and new shells adhere at the lesion site (Fisher et al. 1978). Shell disease  
91 has become prevalent in many UK *C. pagurus* and European lobster *Homarus gammarus*  
92 fisheries since it was first reported by Pearson (1908). The Isle of Man (UK) fishery  
93 displayed shell disease in almost 25% of *C. pagurus* sampled during the summer of 2012  
94 (King et al. 2014), and in a South Wales (UK) fishery, over 50% of *C. pagurus* were affected  
95 in 1997-1998 (Vogan et al. 1999). Between 1985-1987, the West coast of Scotland fishery  
96 displayed shell disease in almost 100% of individuals, significantly higher than in other crab  
97 species analysed in the same survey (Comely & Ansell 1989). Ayres and Edwards (1982)

98 reported 5-7% of affected animals were rejected from a South West Irish fishery and  
99 suggested that the incidence of shell disease was higher in lightly fished populations than in  
100 established fisheries, where intensive exploitation results in the removal of larger, older crabs  
101 from the stock.

102 The aim of the present study was to examine factors contributing towards these two  
103 diseases in a population of *C. pagurus* in both a fished and un-fished area of the Lundy Island  
104 MPA in the Celtic Sea, UK. In the past, this MPA has been reported to have higher levels of  
105 disease in the unfished area due to increased population density, or overcrowding (Wootton et  
106 al. 2012, Davies et al. 2015). Therefore, it was first hypothesized that the population  
107 abundance of *C. pagurus* would be higher in the un-fished area of the MPA compared to the  
108 fished area, as observed in a previous study (Hoskin et al. 2011). The second hypothesis was  
109 that the crabs from the un-fished area would have an increased probability of injury, limb loss  
110 and therefore disease than individuals from the fished area due to overcrowding. Individuals  
111 missing one or more limbs, or with open wounds are expected to have a higher probability of  
112 disease than those with limbs intact, as limb loss creates a large wound, which can act as an  
113 aperture for pathogen entry. Our third hypothesis was that, as experienced in previous studies,  
114 the unfished area would have a higher prevalence of large individuals (herein classified as  
115 individuals over the minimum landing size;  $MLS \geq 160$  mm carapace width for males and  $\geq$   
116 140mm for females) which would in turn exhibit an increased probability of disease and  
117 injury than smaller individuals (those under MLS) as experienced for some infections by  
118 Bateman et al. (2011). In larger animals, longer inter-moult periods give disease more time to  
119 manifest and competition brought on by sexual maturity has also been shown to increase in  
120 older, larger crustacean species (Edwards 1966).

121

122 **MATERIALS AND METHODS**

123

## 124 **Study area**

125         The study took place around Lundy Island, 12 miles off the coast of North Devon,  
126 England, UK (Fig. 1), which was Britain's first MPA. Lundy first consisted of a Refuge Zone  
127 (RZ), established in 1986 when it was designated as Britain's first and only Marine Nature  
128 Reserve. Here, pot fisheries were authorised, but trawl and net fisheries were prohibited. In  
129 2003, A No-Take Zone (NTZ) was incorporated, where all fishing, including potting, and  
130 removal of wildlife is forbidden. Lundy Island became Britain's first Marine Conservation  
131 Zone in 2010.

132

## 133 **Population sampling**

134         The *C. pagurus* population around Lundy Island was sampled in May and July 2010,  
135 and August 2011. One string of baited commercial parlour pots (35 pots with escape gaps  
136 closed) was deployed at a total of 6 sampling sites (4 in the fished RZ and 2 in the unfished  
137 NTZ, Fig. 1). In total, 30 strings were deployed in 2010 and 18 in 2011 with a total of 397  
138 crabs sampled (213 in 2010 and 184 in 2011). Each string was similarly baited, immersed for  
139 24h, retrieved and emptied of all catch. Seven measurements were recorded for each *C.*  
140 *pagurus* caught (Table 1). In order to assess the presence of *Hematodinium* spp. using  
141 molecular methods, *ca.* 500-700 µl of haemolymph was drawn into 1 ml of 100% analytical  
142 grade ethanol using 23 g needles and 2 ml syringes. Crabs exhibiting exoskeletal  
143 abnormalities or severe shell disease were photographed (see Figure 2 for examples of these  
144 conditions). All individuals were measured, traps were re-baited, re-deployed and all catch  
145 returned to the water.

146

## 147 **Surveillance of haemolymph pathogen communities**

148 ***DNA extraction***

149 DNA was extracted from haemolymph using a modified version of Ivanova et al.  
150 (2006, see Section S1, Supplementary Materials). DNA was eluted with water, stabilized with  
151 Tris-EDTA buffer (10 X) and used as the template for polymerase chain reactions (PCR).  
152 Haemolymph DNA extraction was optimized to ensure detection of *Hematodinium* spp. by  
153 using known, positive controls initially derived from *C. pagurus*, confirmed by sequencing.

154

155 ***PCR conditions***

156 All PCR were carried out using primers synthesized by Eurofins MWG Operon  
157 (Ebersberg, Germany) and performed on a Bio-Rad PTC-100 Peltier Thermal Cycler before  
158 being visualized on a 1.5% agarose gel. First, decapod-specific primers were used to verify  
159 the quality of the extracted DNA and the integrity of the PCR reaction (Section S2,  
160 Supplementary Materials). DNA was then amplified using *Hematodinium* spp. specific  
161 primers optimized by Hamilton et al. (2009) in order to test haemolymph DNA for the  
162 presence of *Hematodinium* spp. infection (Section S3, Supplementary Materials).  
163 *Hematodinium* spp. positive samples were repeated, the PCR product cleaned up using the  
164 Wizard SV Gel and PCR Clean-Up System (Promega, Madison, USA) and sequenced by  
165 Eurofins MWG Operon (Ebersberg, Germany). Contigs from sequences were created using  
166 the CAP3 sequence assembly programme (Huang & Madan 1999) and identity confirmed  
167 using matched positive controls via NCBI BLAST.

168

169 **Statistical Analysis**

170 ***Dataset Determination***

171 Data from May and July 2010 were pooled so that one coherent year was used to  
172 compare with the 2011 catch data (see Table S1, Supplementary Materials). To minimize the

173 possibility that individuals from May and July sampling trips were not double sampled (i.e.  
174 released in May, recaptured in July) each individual in the database was given a unique  
175 identifier based on the predictor variables in Table 1 and any individuals sharing the identifier  
176 were noted. The number of potential recaptures was 11.61%. In order that individuals were  
177 not double sampled on consecutive sample days within each month (i.e. recaptured after day  
178 one of a survey and considered a unique individual), the same method was used and 0.36% of  
179 individuals were classified as potential recaptures and removed.

180

### 181 ***Population Ecology***

182 Population distributions of males and females were visualised in GraphPad Prism 5.0, plotted  
183 per site and year. In order to compare catch and size-frequency data between the NTZ and RZ,  
184 data were first tested to follow a normal distribution (using two-sample Kolmogorov-  
185 Smirnov tests) followed by either an independent T test (if data was normal) or Mann-  
186 Whitney test (if data did not follow a normal distribution). Tests were two-tailed and used a  
187 significance level of 0.05. Catch Per Unit of fishing Effort (CPUE) was calculated as the  
188 mean number of animals per pot. A linear regression was used to examine the  
189 relationship between the CPUE of *C. pagurus* and European lobster, *H. gammarus*, the  
190 two commercially viable species found in the pots.

191

### 192 ***Disease and Injury Ecology***

193 Binomial logistic regression models with Logit link functions (following Bernoulli  
194 distributions) were used (MASS library, R Development Core Team 2014) to determine  
195 whether specific predictor variables (Table 1) had a significant effect on the presence of shell  
196 disease, *Hematodinium* spp. infection and injury presence in the crab population sampled.  
197 The information theoretic approach was used for model selection and assessment of



198 performance (Richards 2005). To begin, a suite of models ranging from fully additive to  
199 models combining all possible combinations of single, interactive terms were generated using  
200 the predictor variables highlighted in Table 1. The best models from each suite were selected  
201 based on Akaike’s Information Criterion (AIC) which measures model “quality” based on the  
202 goodness of fit and parsimony of the model: the lower the AIC, the better the model  
203 (Burnham & Anderson 1998, Zuur et al. 2009). Selected initial models are herein referred to  
204 as the *full models*. Once selected, each non-significant predictor variable from the full models  
205 was sequentially removed using the drop1 function (in R) to produce final models with  
206 increased predictive power, herein referred to as the *reduced models*. The drop1 function  
207 compares the initial full model with the same model, minus the least significant predictor  
208 variable. If the reduced model is significantly different from the initial full model (in the case  
209 of binomial response variables, a Chi-squared test is used to compare the residual sum of  
210 squares of both the models), then the removed predictor variable is kept out of the new,  
211 reduced model. This process continues hierarchically until a final reduced model is produced  
212 (Zuur et al. 2009). Fitted probability plots were used to visualize the significant relationships  
213 inferred from the reduced models using carapace width (CW) as the independent variable.  
214 The probability of a crab having shell disease, *Hematodinium* spp. infection or being injured,  
215 was calculated using the following equation:

216

217 *Equation 1:*  $\rho = 1/(1 + \exp^{-\beta x})$

218

219 Where  $\rho$  is the probability of shell disease, *Hematodinium* spp. infection or injury presence  
220 and  $\beta x$  is the estimate for the predictor variable analysed (Table 1).

221

222 **RESULTS**

223

224

## 225 **General population ecology**

226 Comparative analysis between the two sites (fished; RZ vs. un-fished; NTZ) revealed  
227 that there were significantly more crabs caught per string in the RZ than in the NTZ in both  
228 the 2010 and 2011 surveys (2010:  $P = 0.003$ ,  $t = 3.62$ ,  $NTZ = 6 \pm 1.86$ ,  $RZ = 38 \pm 9.82$ ;  
229 2011:  $P = 0.002$ ,  $t = 2.97$ ,  $NTZ = 0.83 \pm 0.83$ ,  $RZ = 22.38 \pm 6.19$  [mean values  $\pm$  SEM], Fig.  
230 3). The CPUE was 6.3 times greater in the RZ than in the NTZ in 2010 and 26.9 times greater  
231 in 2011.

232 There was no significant difference in the number of crabs above the MLS caught  
233 between the NTZ and RZ in either 2010 or 2011 ( $P > 0.05$ , see Table 2 and Fig. 5A-D). Not  
234 accounting for the sex of crabs, the size frequency distributions were significantly different  
235 between the NTZ and RZ in 2010 ( $P = 0.005$ ) and 2011 ( $P < 0.001$ ). There was, however, no  
236 significant difference between the size of crabs in the NTZ and the RZ in 2010 ( $P = 0.205$ ) or  
237 2011 ( $P = 0.077$ ), even when separating crabs by sex in 2010 (males  $P = 0.249$ , females  $P =$   
238  $0.488$ , Fig. 5A-D). Due to the low abundance of crabs caught in the NTZ in 2011 ( $n$  male = 4,  
239  $n$  female, = 1), size differences between zones could not be tested. No ovigerous ('berried')  
240 females were caught in either year from either zone.

241

## 242 **Shell Disease**

243 Comparative analysis between the two sites (fished; RZ vs. un-fished; NTZ) revealed  
244 that there was no significant change in shell disease prevalence between sites. However,  
245 when combining data from both sites, analysis highlighted that the percentage of shell  
246 diseased crabs increased significantly by *ca.*15% between 2010 and 2011 ( $P = 0.002$ , Table  
247 2). There was no significant effect of site, limb loss, landing size, injury, sex or

248 *Hematodinium* spp. infection in explaining shell disease presence in 2010 (Table S2, Model  
249 S1). Sex, limb loss, and the interaction between *Hematodinium* spp. and sex (infected male  
250 crabs), all had a significant effect on the presence of shell disease in 2011 (Table 3). If a crab  
251 was male, or a crab was missing a limb, the probability of it having shell disease increased by  
252 87% and 74% respectively (Fig. 6). Crabs which were male and harboured *Hematodinium*  
253 spp. were 2% **less** likely to exhibit shell disease.

254

### 255 **Presence of *Hematodinium* spp**

256 Comparative analysis between the two sites (fished; RZ vs. un-fished; NTZ) revealed  
257 that there was no significant change in *Hematodinium* spp. prevalence between sites.  
258 However, only 19 out of 397 individuals tested positively for *Hematodinium* spp. (Table 2).  
259 None of the predictor variables were significant in predicting the presence of *Hematodinium*  
260 spp. in 2010 (Table S2, Model S3). Sex had a significant effect in determining *Hematodinium*  
261 spp. infection in 2011 (Table S2, Model S4) but this proved marginally non-significant  
262 following model reduction (Table 4).

263

### 264 **Injury**

265 Comparative analysis between the two sites (fished; RZ vs. un-fished; NTZ) revealed  
266 that there was no significant change in injury prevalence between sites. However, when  
267 combining data from both sites, analysis highlighted that the percentage of injured crabs  
268 (examples of which can be seen in Fig. 2E-G) increased significantly by *ca.* 12% between  
269 2010 and 2011 ( $P < 0.001$ , Table 2).

270 In 2010, landing size, site and sex were not significant in predicting the presence of  
271 injury (Table S2, Model 5), even after model reduction, and therefore no reduced model was  
272 produced. In 2011, although none of the predictor variables significantly predicted the

273 presence of injury in the full model (Table S2, Model S6) after model reduction, landing size  
274 was significant in predicting injury presence (Table 5). Crabs below the MLS in 2011 had an  
275 11% higher probability of being injured than those above the MLS (Fig. 7).

276

## 277 **DISCUSSION**

278 Overall, more crabs were caught in the RZ compared with the NTZ in both years,  
279 rejecting our first hypothesis. Our second hypothesis was also rejected (crabs from the un-  
280 fished NTZ would have an increased probability of injury and therefore disease than  
281 individuals from the fished RZ). Shell disease increased from 2010 to 2011 in line with injury.  
282 However, only if a crab was male or missing a limb, did the probability of it having shell  
283 disease increase in 2011. Crabs below the MLS in 2011 had a higher probability of being  
284 injured than those above the MLS, rejecting the third hypothesis that larger animals would  
285 have higher disease/injury.

286 **Hypothesis 1.** The population ecology observed in this study contrasted to that  
287 of a previous survey of *C. pagurus* around Lundy Island MPA. In a 4-year survey from 2003-  
288 2007, Hoskin et al. (2011) described higher abundances, and larger *C. pagurus* within the  
289 NTZ than the RZ. This contrasts to the current results from 2010 and 2011 in which we found  
290 higher abundances of *C. pagurus* in the RZ. There are various possible explanations for this  
291 finding. *C. pagurus* migrate up to 345 m day<sup>-1</sup> in order to avoid predators, competition from  
292 conspecifics, and to mate or find brooding sites (Ungfors et al. 2007, Hunter et al. 2013), it is  
293 therefore plausible that the low crab abundance described in 2011 is due to natural movement  
294 of populations out of the NTZ into adjacent areas. However, in addition, density dependent  
295 habitat selection whereby an increased abundance of one species may change the dynamics of  
296 another has been described in detail by many authors (e.g. Breen & Mann 1976, Morris 2003,  
297 Acheson & Gardener 2014). European lobsters, *H. gammarus*, were also caught in the pots

298 sampled during this study (further discussed in Davies et al. 2015) and it is noteworthy that as  
299 the abundance of lobsters per string increased, the abundance of crabs decreased significantly  
300 (2010:  $R^2 = 0.537$ ,  $F_{1, 14} = 16.22$ ,  $P = 0.0012$ , 2011:  $R^2 = 0.437$ ,  $F_{1,12} = 9.320$ ,  $P = 0.01$ ; Fig.  
301 4). Although studies have shown that if a larger predator is present in a pot, other animals  
302 will not enter as willingly (Lovewell et al. 1988, Miller & Addison 1995), there is also  
303 evidence to that low *C. pagurus* abundances may be driven by increased abundances of the  
304 European lobster, *Homarus gammarus*, found in the NTZ (Wootton et al 2012, Davies et al.  
305 2015). This phenomenon was also observed by Howarth et al. (2016) who noted that in a  
306 fully protected MPA in Scotland, the greater densities of large adult lobsters appeared to be  
307 predated and/or competitively displacing juvenile lobsters, *C. pagurus*, and velvet swimming  
308 crabs (*Necora puber*) from the area. This highlights community changes as a result of MPA  
309 implementation which may not always be positive, and that recovery is not straightforward,  
310 since the recovery of some species can have knock-on effects on others. As one species  
311 benefits from implementation (in this case, the apex predator, *H. gammarus*), others (i.e. *C.*  
312 *pagaurus*) can be detrimentally affected, altering overall ecosystem function.

313 **Hypothesis 2.** Crabs were no more likely to be found with injury, limb loss or disease  
314 in the un-fished NTZ compared to the fished RZ as has been found in previous studies. This  
315 is likely due to higher population density in the RZ and interactions with other species. The  
316 higher levels of shell disease found in males compared to females (in both sites combined) is  
317 likely caused by increased male-male interaction and resultant injuries during the mating  
318 season (the time of our study). Male crabs engage in agonistic behaviour with conspecifics  
319 due to their territorial and competitive nature, increasing the risk of injury (Schöne 1968,  
320 Vogan et al. 1999) limb loss and therefore disease (Vogan et al. 2008). Lost limbs create a  
321 large aperture for haemolymph loss, tissue exposure and pathogen entry, in addition to an  
322 increased risk of shell disease lesion initiation stemming from the fracture site. This may

323 therefore account for shell disease presence being higher in those crabs that had lost one or  
324 more limbs.

325 **Hypothesis 3.** The unfished NTZ in Lundy was not found to harbour larger crabs than  
326 in the fished, RZ as previously noted by Hoskin et al. (2011). Similarly, larger crabs (>MLS)  
327 were not found to exhibit more injury and disease as previously found in some crustacean  
328 species (Bateman et al. 2011, Wootton et al. 2012, Davies et al. 2015). In contrast, the  
329 probability of injury increased significantly in both male and female crabs **below** the MLS. *C.*  
330 *pagurus* above the MLS are sexually mature and potential injury above this size in theory is  
331 likely to increase due to conflict from protection and display during mating (Edwards 1966).  
332 However, one explanation for the increased injury in individuals below the MLS found in the  
333 present study, could be due to competitive interactions with the significantly more abundant,  
334 larger and more aggressive predator, the lobster, *H. gammarus*. Another explanation could be  
335 injury from species on which *C. pagurus* feeds. *C. pagurus* is an active predator that  
336 consumes a variety of crustaceans including the green shore crab *Carcinus maenas*, which is  
337 an aggressive and territorial species (Kaiser et al. 1990). *C. maenas* has been shown to  
338 contribute to injury in its predators especially if the predators are smaller and inexperienced  
339 hunters (Rosson et al. 2006), and this could include small *C. pagurus* (below the MLS).

340 Overall, there were very few crabs caught infected with *Hematodinium* spp. over both  
341 years sampled. Similarly, low numbers have been described in other studies of wild *C.*  
342 *pagurus* populations (Chualáin et al. 2009) and may be explained by the observation that  
343 *Hematodinium* spp. in *C. pagurus* is mainly found in smaller or juvenile crabs which live  
344 closer to the shoreline than the areas sampled in this study (Stentiford 2008, Chualáin et al.  
345 2009). Therefore, most crabs surveyed in the current study were adults (even though escape  
346 gaps on sampling pots were closed). Due to the low numbers of *Hematodinium* spp. infected  
347 individuals found in this study, it would be beneficial in future studies to survey closer to

348 shorelines and modify traps to restrict larger crab and lobster entry. This would allow for a  
349 better census of juveniles, who are more likely to display the disease.

350 The current study only provides a ‘snap shot’ of population abundance and disease  
351 ecology. It does, however, reiterate the importance of disease monitoring within both fished  
352 and protected populations, and especially those that have shown significant increases in local  
353 abundance. Long-term monitoring studies of MPAs (those observed over a number of years)  
354 have revealed strong patterns, including spillover into adjacent fisheries and significant  
355 increases in abundance (Abesamis & Russ 2005, Stobart et al. 2009, Aburto-Oropeza et al.  
356 2011) that may not be possible to detect during small-scale studies such as this. It would  
357 therefore be beneficial to monitor MPAs such as Lundy for longer periods, accounting for  
358 natural variability driven by external factors such as adjacent fisheries, natural competition  
359 and climate anomalies. At present, disease monitoring does not appear to be a priority in the  
360 implementation and management of protected areas. By monitoring disease, managers can be  
361 better prepared to deal with any unwanted consequences of fisheries closures such as  
362 potential increases in disease and consequent population decline. Better monitoring will allow  
363 pre-emptive management measures to be taken. An example of this could be the re-opening  
364 of closed areas for limited fishing of certain species, before levels of abundance become high  
365 enough to contribute to disease. This would allow real-scale tests of ‘fishing out’ disease, or  
366 help strike a balance between allowing enough fishing to keep populations healthy without  
367 interfering with explicit conservation aims (McCallum et al. 2005, Wood et al. 2010).

368 To effectively and sustainably manage, exploit and conserve marine populations, it is  
369 imperative to monitor both the prevalence and geographical range of important marine  
370 pathogens, especially those affecting keystone and species of commercial interest (McCallum  
371 & Dobson 1995, Lamb et al. 2016). This is particularly pertinent for protected areas, where  
372 detrimental secondary community effects have been shown to occur. Robust monitoring

373 programmes in such areas, covering a range of species and variables, would assist in  
374 achieving conservation aims and allow management strategies to be adjusted according to  
375 local ecological change.

376

377 **Acknowledgements.** This research was funded by SEAFISH and the ERDF INTERREG  
378 IVA, Ireland-Wales programme grant -SUSFISH (Project No. 042) to AFR. CED was part-  
379 funded by a tuition fee bursary from Swansea University's Colleges of Science and Medicine  
380 and would also like to thank the Society of Biology and Climate Change Consortium for  
381 Wales (C3W) for travel grants enabling the collaboration with the AVC Lobster Science  
382 Centre. The authors would like to thank Geoff Huelin and the crew of FV 'Our Jenny', plus  
383 Devon and Severn IFCA and Natural England for permission to sample crabs in the No-take  
384 Zone of Lundy Island. We also thank Dr. Gethin Thomas, Dr. Richard Unsworth, Dr. Ed  
385 Pope, Dr. Kristina Hamilton, Keith Naylor and Ian Tew of Swansea University, and Lundy  
386 Island staff for their support during sampling. We also thank Mrs Carolyn Greig of Swansea  
387 University and Mr Adam Acorn of the AVC Lobster Science Centre, UPEI for laboratory  
388 assistance and Dr Hilmar Hinz of IMEDEA, Mallorca for statistical advice.



389 **References**

390 Abesamis R, Russ G (2005) Density-dependent spillover from a marine reserve: long term  
391 evidence. *Ecol Appl* 15: 1798–1812

392

393 Aburto-Oropeza O, Erisman B, Galland GR, Mascareñas-Osorio I, Sala E, Ezcurra E (2011)  
394 Large recovery of fish biomass in a no-take marine reserve. *PLoS ONE*. 6: e23601

395

396 Acheson J, Gardner R (2014) Fishing failure and success in the Gulf of Maine: lobster and  
397 groundfish management. *Marit Stud* 13:1–21

398

399 Ayres PA, Edwards E (1982) Notes on the distribution of “black spot” shell disease in  
400 crustacean fisheries. *Chem Ecol* 1:125–130

401

402 Baross JA, Tester PA, Morita RY (1978) Incidence, microscopy, and etiology of exoskeleton  
403 lesions in the Tanner crab, *Chionoecetes tanneri*. *J Fish Res Board Can* 35:1141-1149

404

405 Bateman K, Hicks R, Stentiford G (2011) Disease profiles differ between non-fished and  
406 fished populations of edible crab (*Cancer pagurus*) from a major commercial fishery. *ICES J*  
407 *Mar Sci* 68:2044–2052

408

409 Breen PA, Mann KH (1976) Changing lobster abundance and the destruction of kelp beds.  
410 *Mar Biol* 24:137–142

411

412 Burge CA, Mark Eakin C, Friedman CS, Froelich B, Hershberger PK, Hofmann EE, Petes  
413 LE, Prager KC, Weil E, Willis BL, Ford SE, Harvell CD (2014) Climate change influences

414 on marine infectious diseases: implications for management and society. *Ann Rev Mar Sci*  
415 6:249–77

416

417 Burnham K, Anderson D (1998) Model selection and inference: a practical information-  
418 theoretic approach. Springer, New York, NY

419

420 Chatton E, Poisson R (1931) Sur l'existence, dans le sang des crabes, de Peridiniens  
421 parasites: *Hematodinium perezii* n. g., n. sp. (Syndinidae). *C R Seances Soc Biol* 105:553–557

422

423 Chualáin CN, Hayes M, Allen B, Robinson M (2009) *Hematodinium* sp. in Irish *Cancer*  
424 *pagurus* fisheries: infection intensity as a potential fisheries management tool. *Dis Aquat*  
425 *Organ* 83:59–66

426

427 Christianen MJA, Herman PMJ, Bouma TJ, Lamers LPM, Katwijk MM van, Heide T van  
428 der, Mumby PJ, Silliman BR, Engelhard SL, Kerk M van de, Kiswara W, Koppel J van de  
429 (2014) Habitat collapse due to overgrazing threatens turtle conservation in marine protected  
430 areas. *Proc R Soc* 281

431

432 Comely CA, Ansell AD (1989) The occurrence of black necrotic disease in crab species from  
433 the West of Scotland. *Ophelia* 30:95–112

434

435 Davies CE, Johnson AF, Wootton EC, Greenwood SJ, Clark KF, Vogan CL, Rowley AF  
436 (2015) Effects of population density and body size on disease ecology of the European  
437 lobster in a temperate marine conservation zone. *ICES J Mar Sci* 72 (suppl\_1): i128-i1 doi:  
438 10.1093/icesjms/fsu237

- 439 Edwards E (1966) Mating behaviour in the European edible crab (*Cancer pagurus* L.).  
440 Crustaceana 10:23–30  
441
- 442 FAO (Food and Agriculture Organization of the United Nations) FishStat Database (2014).  
443 (Latest update: 31 Jan 2014) Accessed (9 Sep 2014). URL: [http://data.fao.org/ref/babf3346-  
444 ff2d-4e6c-9a40-ef6a50fcd422.html?version=1.0](http://data.fao.org/ref/babf3346-ff2d-4e6c-9a40-ef6a50fcd422.html?version=1.0)  
445
- 446 Field RH, Chapman CJ, Taylor AC, Neil DM, Vickerman K (1992) Infection of the Norway  
447 lobster *Nephrops norvegicus* by a *Hematodinium*-like species of dinoflagellate on the west  
448 coast of Scotland. Dis Aquat Org 13:1–15  
449
- 450 Fisher WS, Nilson EH, Steenbergen JF, Lightner DV (1978) Microbial diseases of cultured  
451 lobsters: a review. Aquaculture 14:115–140  
452
- 453 Halpern BS, Warner RR (2002) Marine reserves have rapid and lasting effects. Ecol Lett  
454 5:361–365  
455
- 456 Hamilton KM, Shaw PW, Morrill D (2009) Prevalence and seasonality of *Hematodinium*  
457 (Alveolata: Syndinea) in a Scottish crustacean community. ICES J Mar Sci 66:1837–1845  
458
- 459 Harvell C, Kim K, Burkholder J, Colwell R, Epstein D, Grimes D, Hofmann E, Lipp E,  
460 Osterhaus A, Overstreet R, Porter J, Smith G, Vasta G (1999) Emerging marine diseases--  
461 climate links and anthropogenic factors. Science (80- ) 285:1505–1510  
462

- 463 Harvell D, Mitchell CE, Ward JR, Altizer S, Dobson A and others (2002) Climate warming  
464 and disease risks for terrestrial and marine biota. *Science* 296:2158–2162  
465
- 466 Harvell D, Aronson R, Baron N, Connell J, Dobson A and others (2004) The rising tide of  
467 ocean diseases: unsolved problems and research priorities. *Front Ecol Environ* 2:375–382  
468
- 469 Hoskin MG, Coleman R A, Carlshausen E von, Davis CM (2011) Variable population  
470 responses by large decapod crustaceans to the establishment of a temperate marine no-take  
471 zone. *Can J Fish Aquat Sci* 68:185–200  
472
- 473 Howarth LM, Dubois P, Gratton P, Judge M, Christie B, Waggitt JJ, Hawkins JP, Roberts  
474 CM, Stewart BD (2017) Trade-offs in marine protection: multispecies interactions within a  
475 community-led temperate marine reserve. *ICES J Mar Sci* 74 (1): 263-276  
476
- 477 Huang X, Madan A (1999) CAP3: A DNA sequence assembly program. *Genome Res* 9:868-  
478 877  
479
- 480 Hunter E, Eaton D, Stewart C, Lawler A, Smith MT (2013) Edible crabs “go West”:  
481 Migrations and incubation cycle of *Cancer pagurus* revealed by electronic tags. *PLoS ONE*  
482 8(5):e63991  
483
- 484 Ivanova NV, Dewaard JR, Hebert PDN (2006) An inexpensive, automation-friendly protocol  
485 for recovering high-quality DNA. *Mol Ecol Notes* 6:998–1002  
486

487 Jackson JB, Kirby MX, Berger WH, Bjorndal KA, Botsford LW, Bourque BJ, Bradbury RH,  
488 Cooke R, Erlandson J, Estes JA, Hughes TP, Kidwell S, Lange CB, Lenihan HS, Pandolfi JM,  
489 Peterson CH, Steneck RS, Tegner MJ, Warner RR (2001). Historical overfishing and the  
490 recent collapse of coastal ecosystems. *Science* 293: 629-637  
491  
492 Kaiser MJ, Hughes RN, Reid DG (1990) Chelal morphometry, prey-size selection and  
493 aggressive competition in green and red forms of *Carcinus maenas* (L.). *J Exp Mar Biol Ecol*  
494 140:121-134  
495  
496 King NG, Duncan PF, Kennington K, Wootton EC, Jenkins SR (2014) Characterisation of  
497 shell disease syndrome in the brown crab, *Cancer pagurus*, in a discrete Irish Sea fishery. *J*  
498 *Crustac Biol* 34:40–46  
499  
500 Lafferty KD, Hofmann EE (2016) Marine disease impacts, diagnosis, forecasting,  
501 management and policy. *Philos Trans R Soc London B Biol Sci* 371  
502  
503 Lamb JB, Wenger AS, Devlin MJ, Ceccarelli DM, Williamson DH, Willis BL (2016)  
504 Reserves as tools for alleviating impacts of marine disease. *Philos Trans R Soc London B*  
505 *Biol Sci* 371  
506  
507 Lebarbenchon C, Poulin R, Gauthier-Clerc M, Thomas F (2006) Parasitological  
508 consequences of overcrowding in protected areas. *Ecohealth* 3:303–307  
509  
510 Leo GA De, Micheli F (2015) The good, the bad and the ugly of marine reserves for fishery  
511 yields. *Phil Trans R Soc B* 370:20140276

512

513 Lovewell SR, Howard a. E, Bennett DB (1988) The effectiveness of parlour pots for catching

514 lobsters (*Homarus gammarus* (L.)) and crabs (*Cancer pagurus* L.). *ICES J Mar Sci* 44:247–

515 252

516

517 Maynard J, Hooidonk R van, Harvell CD, Eakin CM, Liu G, Willis BL, Williams GJ, Groner

518 ML, Dobson A, Heron SF, Glenn R, Reardon K, Shields JD (2016) Improving marine disease

519 surveillance through sea temperature monitoring, outlooks and projections. *Philos Trans R*

520 *Soc London B Biol Sci* 371

521

522 McCallum H, Dobson A (1995) Detecting disease and parasite threats to endangered species

523 and ecosystems. *Tree* 10:190-194

524

525 McCallum H, Gerber L, Jani A (2005) Does infectious disease influence the efficacy of

526 marine protected areas? A theoretical framework. *J Appl Ecol* 42: 688–698

527

528 Miller RJ, Addison JT (1995) Trapping interactions of crabs and American lobster in

529 laboratory tanks. *Can J Fish Aquat Sci* 52:315–324

530

531 Morris, DW (2003) Toward an ecological synthesis: a case for habitat selection. *Oecologia*

532 136:1-13

533

534 Pauly D, Watson R, Alder J (2005) Global trends in world fisheries impacts on marine

535 ecosystems and food security. *Phil T Roy Soc* 360: 5–12

536

- 537 Pearson, J. 1908. *Cancer*. Memoirs of the Liverpool Marine Biology Committee, 16. p 223  
538
- 539 R Development Core Team (2011) R: A Language and Environment for Statistical  
540 Computing. The R Foundation for Statistical Computing. Vienna, Austria. Available online at  
541 <http://www.R-project.org/>  
542
- 543 Richards SA (2005) Testing ecological theory using the information-theoretic approach:  
544 examples and cautionary results. *Ecology* 86:2805-2814  
545
- 546 Rossong MA, Williams PJ, Comeau M, Mitchell SC, Apaloo J (2006) Agonistic interactions  
547 between the invasive green crab, *Carcinus maenas* (Linnaeus) and juvenile American lobster,  
548 *Homarus americanus* (Milne Edwards). *J Exp Mar Bio Ecol* 329:281–288  
549
- 550 Ryazanova TV (2008) Bitter crab syndrome in two species of king crabs from the Sea of  
551 Okhotsk. *Russ J Mar Biol* 34: 411–414  
552
- 553 Schöne H (1968) Agonistic and sexual display in aquatic and semi-terrestrial Brachyuran  
554 crabs. *Am Zool* 8:641–654  
555
- 556 Shields JD, Taylor DM, Sutton, SG, O’Keefe PG and others (2005) Epidemiology of bitter  
557 crab disease (*Hematodinium* sp.) in snow crabs, *Chionoecetes opilio* from Newfoundland,  
558 Canada. *Dis Aquat Org* 64:253-264  
559
- 560 Steadman D, Appleby T, Hawkins J (2014) Minimising unsustainable yield: Ten failing  
561 European fisheries. *Marine Policy* 48: 192-201

562

563 Stentiford GD (2008) Diseases of the European edible crab (*Cancer pagurus*): a review.

564 ICES J Mar Sci 65:1578–1592

565 Stentiford GD, Shields JD (2005) A review of the parasitic dinoflagellates *Hematodinium*

566 species and *Hematodinium*-like infections in marine crustaceans. Dis Aquat Organ 66:47–70

567

568 Stentiford GD, Green M, Bateman K, Small HJ, Neil DM and others (2002) Infection by a

569 *Hematodinium*-like parasitic dinoflagellate causes Pink Crab Disease (PCD) in the edible

570 crab *Cancer pagurus*. J Invertebr Pathol 79:179–91

571

572 Stobart B, Warwick R, González C, Mallol S, Díaz D and others (2009) Long-term and

573 spillover effects of a marine protected area on an exploited fish community. Mar Ecol Prog

574 Ser 384:47–60

575

576 Ungfors A, Hallback A, Nilsson P (2007) Movement of adult edible crab (*Cancer pagurus*

577 L.) at the Swedish West Coast by mark-recapture and acoustic tracking. Fish Res 84:345-357

578

579 Vogan C, Llewellyn P, Rowley A (1999) Epidemiology and dynamics of shell disease in the

580 edible crab *Cancer pagurus*: a preliminary study of Langland Bay, Swansea, UK. Dis Aquat

581 Org 35:81–87

582

583 Vogan CL, Rowley AF (2002) Dynamics of shell disease in the edible crab *Cancer pagurus*:

584 a comparative study between two sites on the Gower Peninsula, South Wales, UK. Dis Aquat

585 Org 52:151–157

586



587 Vogan CL, Powell A, Rowley AF (2008) Shell disease in crustaceans - just chitin recycling  
588 gone wrong? Environ Microbiol 10:826–35  
589  
590 Ward JR, Lafferty KD (2004) The elusive baseline of marine disease: Are diseases in ocean  
591 ecosystems increasing? PLoS Biol 2(4):e120  
592  
593 Wilhelm G, Mialhe E (1996) Dinoflagellate infection associated with the decline of *Necora*  
594 *puber* crab populations in France. Dis Aquat Org 26:213–219  
595  
596 Wood CL, Lafferty KD (2015) How have fisheries affected parasite communities?  
597 Parasitology 142:134-44  
598  
599 Wood CL, Lafferty KD, Micheli F (2010) Fishing out marine parasites? Impacts of fishing on  
600 rates of parasitism in the ocean. Ecol Lett 13:761–75  
601  
602 Wood CL, Micheli F, Fernández M, Gelcich S, Castilla JC, Carvajal J (2013) Marine  
603 protected areas facilitate parasite populations among four fished host species of central Chile.  
604 J Anim Ecol 82:1276–87  
605  
606 Wootton EC, Woolmer AP, Vogan CL, Pope EC, Hamilton KM and others (2012) Increased  
607 disease calls for a cost-benefits review of marine reserves. PLoS One 7:e51615  
608  
609 Worm B, Barbier EB, Beaumont N, Duffy EJ, Folke C and others (2009) Impacts of  
610 biodiversity loss on oceans ecosystems services. Science 314:787–790  
611

612 Zuur A, Ieno EN, Walker N, Saveliev AA, Smith GM (2009) GLM and GAM for Absence-  
613 Presence and Proportional Data. In: Mixed Effects Models and Extensions in Ecology with R,  
614 Springer, New York, NY, p 245

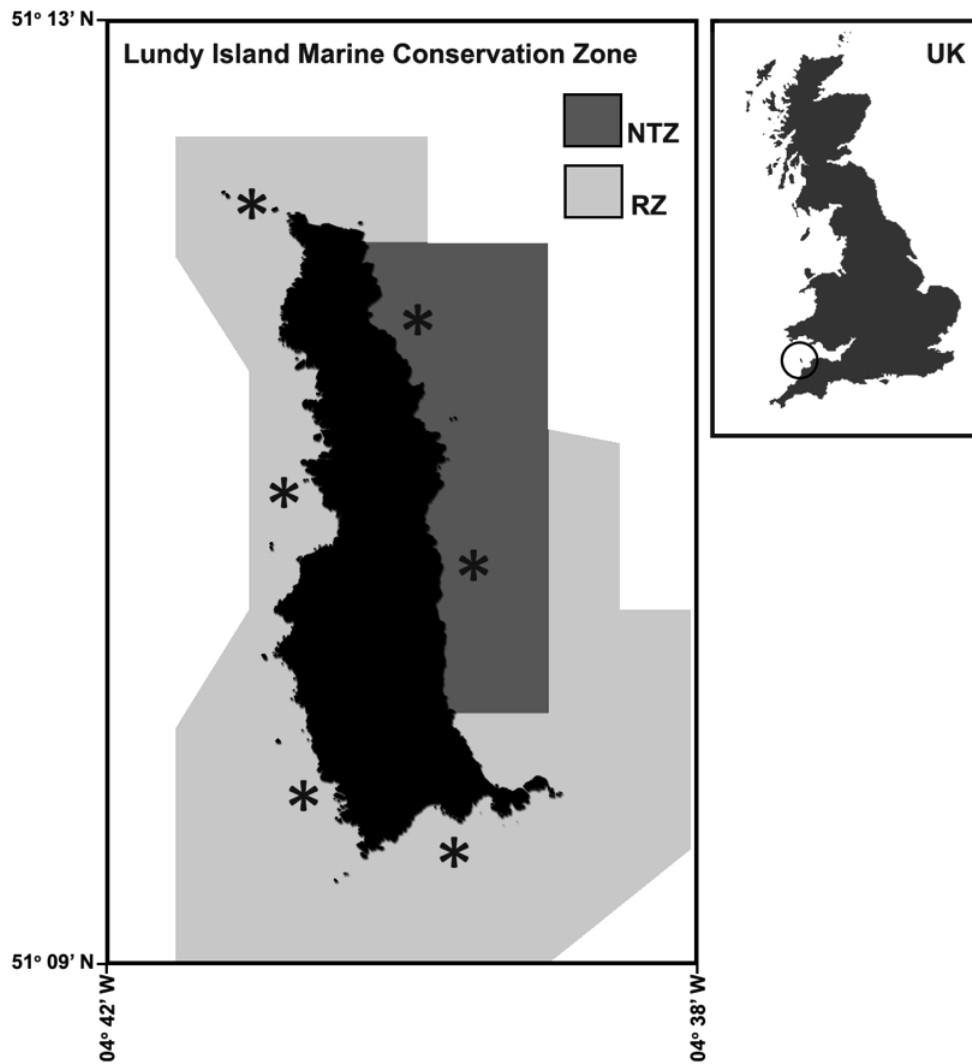

615

616 **Figure 1.** Map showing the Lundy Island MPA Marine Conservation Zone and sampling  
617 sites (\*) at which strings of pots were deployed within the NTZ and RZ. Lundy's position  
618 relative to the UK is circled in the smaller map. Adapted from Davies *et al.* (2015).

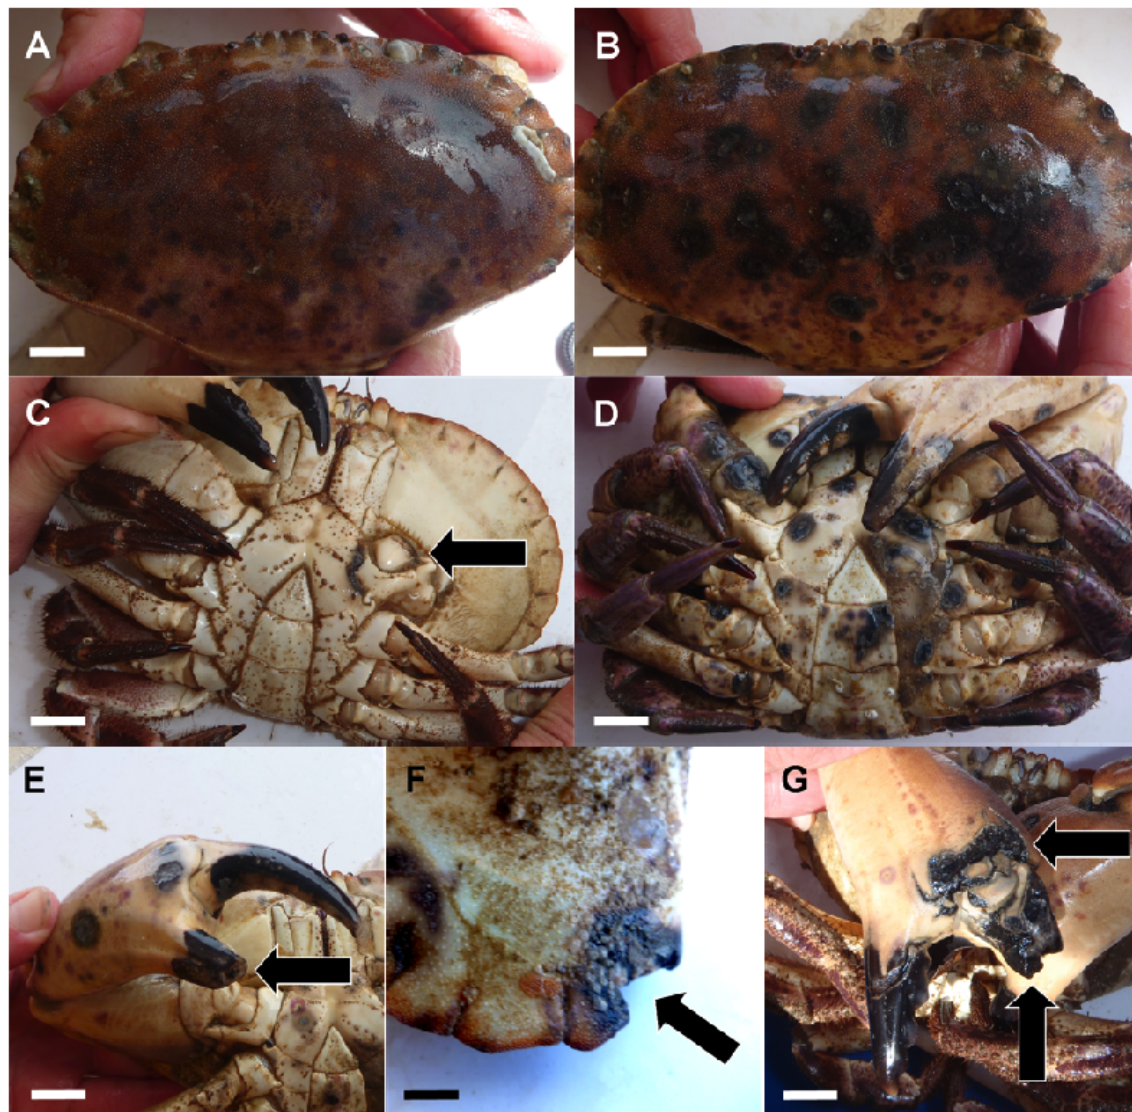

619

620

621 **Figure 2.** Examples of *C. pagurus* displaying a healthy (A) and shell diseased (B) dorsal

622 carapace, a healthy (C) ventral carapace with limb loss (black arrow), a shell diseased ventral

623 carapace (D) and (E-G) examples of injury at various sites (black arrows): (E) the propodus

624 region of a chela, missing, (F) edge of carapace and, (G) the propodus region of a chela.

625 Scale bars represent 2 cm.

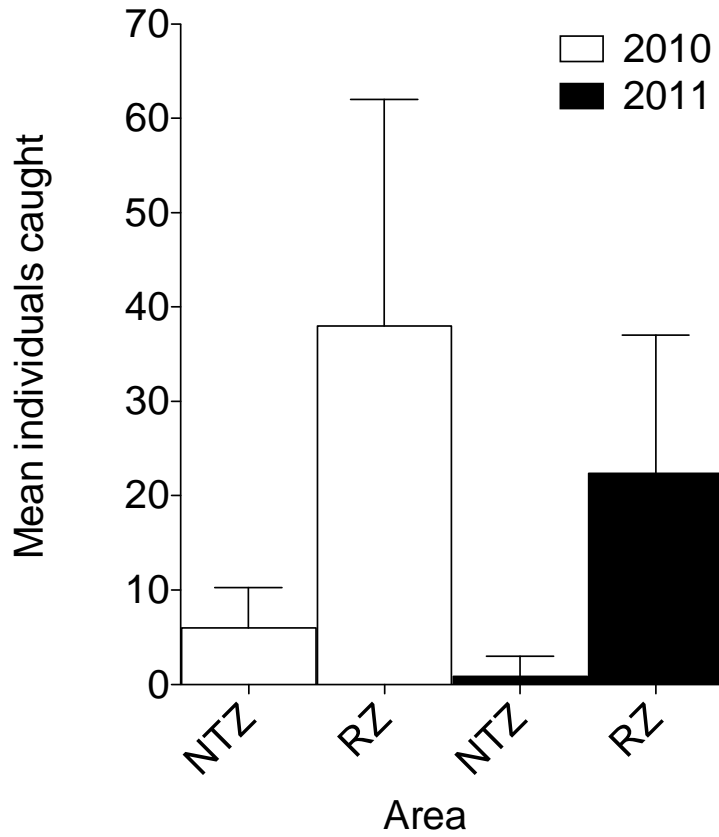

626

627

628 **Figure 3.** Mean number of edible crabs (with 95% CI) caught per 35-pot string in the No-

629 Take Zone (NTZ) and Refuge Zone (RZ) in 2010 and 2011.

630

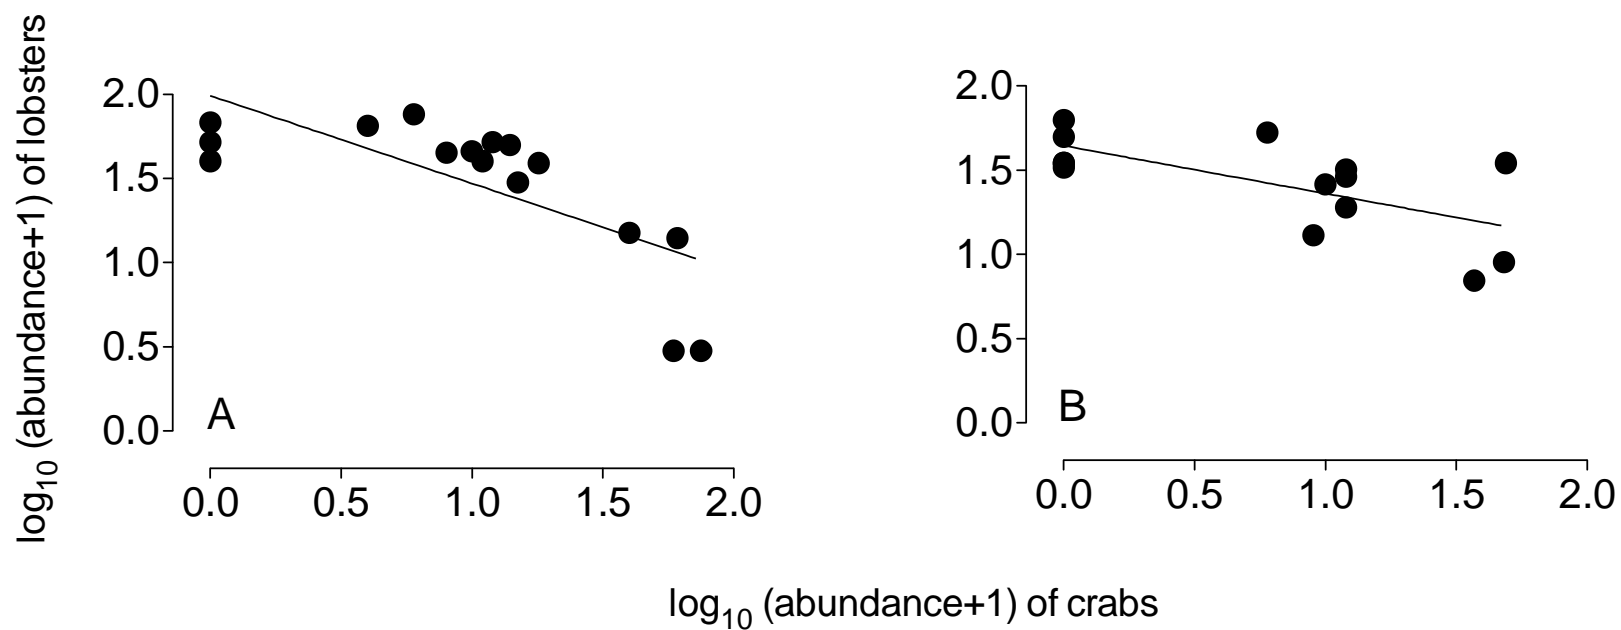

631

632 **Figure 4.** Linear regression showing the abundance of lobsters plotted against the abundance of crabs per string in (A) 2010 and (B) 2011. Each

633 point represents one string of 35 parlour pots.

2010

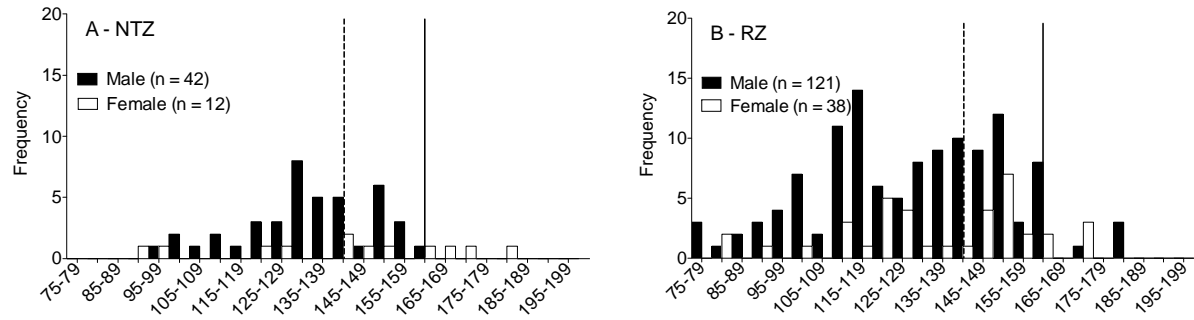

2011

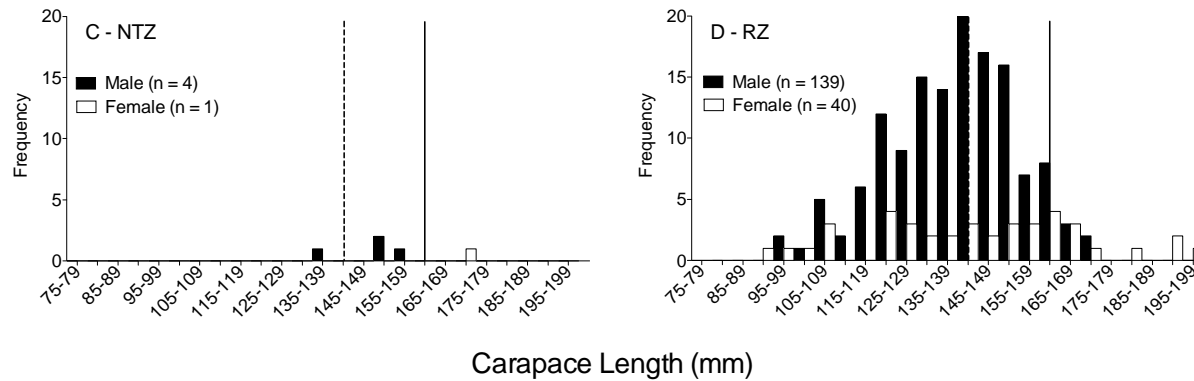

Carapace Length (mm)

634

635

636 **Figure 5.** Size-frequency distributions of male and female crabs surveyed from 2010 (A, B) and 2011 (C, D). Broken lines indicate minimum

637 landing size (MLS) for females (carapace width  $\geq 140$  mm) and solid lines indicate MLS for males (carapace width  $\geq 160$  mm).

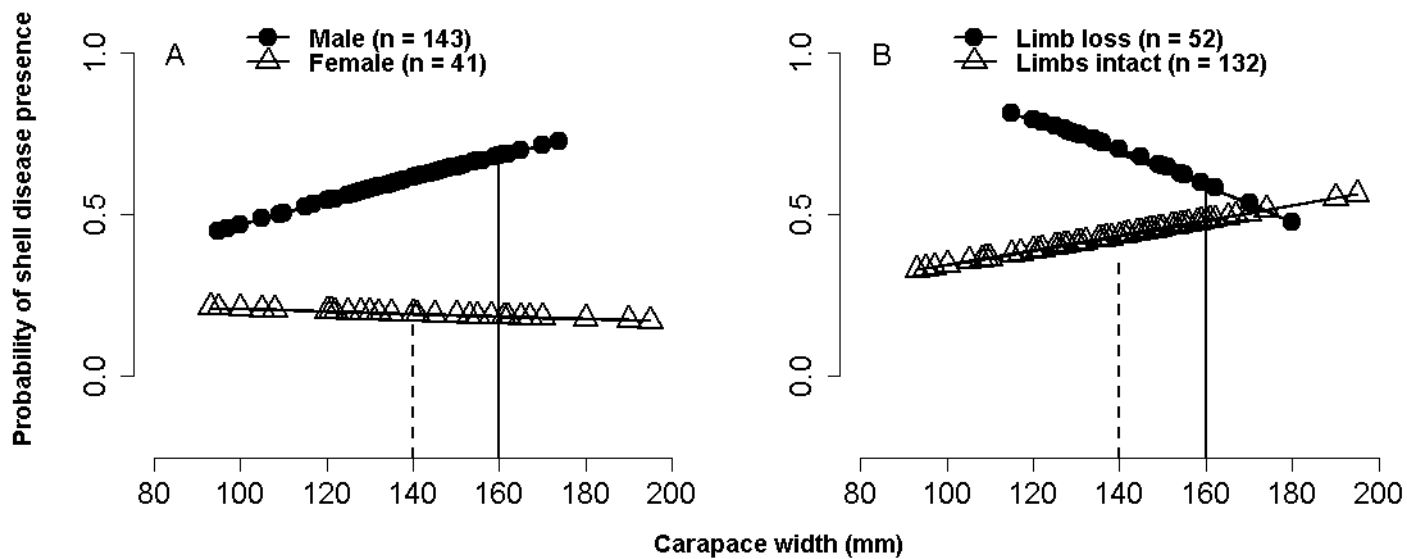

638

639

640

641 **Figure 6.** Fitted probability plots of shell disease presence in 2011 against carapace width, separated by significant predictor variables (A) sex

642 and (B) limb loss (Table 3). The broken line in each plot indicates minimum landing size (MLS) for females (carapace width  $\geq 140$  mm) and the

643 solid line indicates MLS for males (carapace width  $\geq 160$  mm).



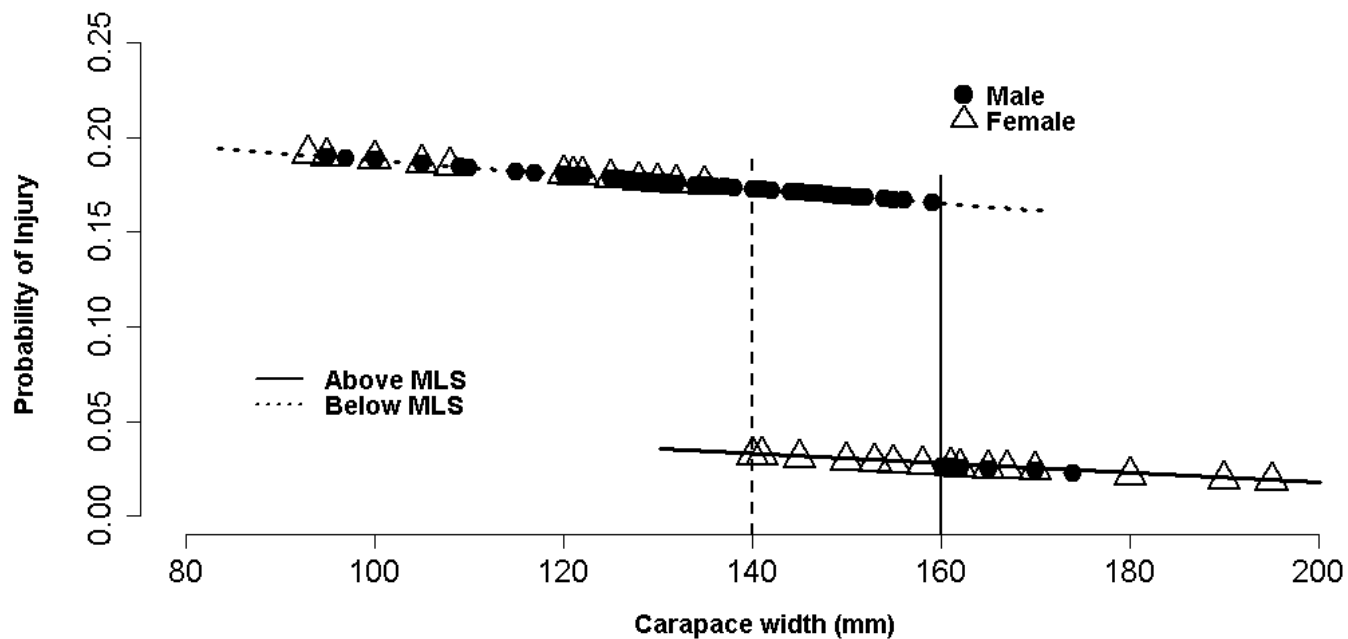

644

645 **Figure 7.** Fitted probability plot of injury presence against carapace width, separated by the significant predictor variable of above vs. below

646 minimum landing size (MLS) (Table 5). The broken line indicates minimum landing size for females (carapace width  $\geq 140$  mm) and the solid

647 line indicates MLS for males (carapace width  $\geq 160$  mm).

648

649 **Table 1.** Parameters recorded for each individual *C. pagurus* caught. Parameters used as predictor variables in binomial logistic regression  
 650 models are denoted as: \*for shell disease, †for *Hematodinium* spp. and ‡for injury.

| Measurement                             | Description                                                                                                                                                                                  | Measure                        |
|-----------------------------------------|----------------------------------------------------------------------------------------------------------------------------------------------------------------------------------------------|--------------------------------|
| <b>Berried</b>                          | Presence of eggs attached to underside of abdomen of females                                                                                                                                 | Presence vs. Absence (P vs. A) |
| <b>Carapace width (CW)</b>              | Width across the dorsal carapace at widest point                                                                                                                                             | Continuous measure (mm)        |
| <b>Injury *,†</b>                       | Wounds such as punctures and stress fractures breaching the cuticle. Injuries inflicted during captivity within the pot (i.e. recent, non-melanised breach of the cuticle) were not recorded | P vs. A                        |
| <b>Limb loss *,†</b>                    | Missing cheliped or walking leg                                                                                                                                                              | P vs. A                        |
| <b>Minimum landing size (MLS) *,†,‡</b> | MLS (width of carapace) as designated by The Devon and Severn IFCA District shore Fisheries and Conservation Authority byelaw (≥140mm for females, ≥160mm for males)                         | 0 (below MLS) or 1 (above MLS) |
| <b>Sex *,†,‡</b>                        | Gender of crab (male or female)                                                                                                                                                              | M vs. F                        |
| <b>Shell disease presence</b>           | Shell disease (photographic examples in Figure 2)                                                                                                                                            | P vs. A                        |

651

652 **Table 2.** Percentages of crabs according to predictor variable used in models.

|                                 | 2010 (%) |      |       | 2011 (%) |      |       |
|---------------------------------|----------|------|-------|----------|------|-------|
|                                 | NTZ      | RZ   | Total | NTZ      | RZ   | Total |
| <b>Shell disease</b>            | 33       | 36.5 | 35.7  | 80       | 50.3 | 51.1  |
| <b><i>Hematodinium</i> spp.</b> | 7.4      | 4.4  | 5.2   | 0        | 4.5  | 4.3   |
| <b>Injury</b>                   | 1.9      | 3.1  | 2.8   | 20       | 14.5 | 14.7  |
| <b>Above MLS</b>                | 16.7     | 18.9 | 18.3  | 20       | 20.1 | 20.1  |

653

654 **Table 3.** Binomial logistic regression Model 1, reduced from the full model (Table S2, Model S2), testing the effects of sex, *Hematodinium* spp.  
 655 presence and limb loss on the presence of shell disease in 2011.

656

| Model                                                      | Predictor variable                   | Estimate (slope) | ± Standard Error | P value    |
|------------------------------------------------------------|--------------------------------------|------------------|------------------|------------|
|                                                            | <i>Sex (Male)</i>                    | 1.8977           | 0.4866           | 9.63e-05 * |
| <i>Shell Disease ~ Sex * Hematodinium spp. + Limb Loss</i> | <i>Hematodinium spp. (Yes)</i>       | 1.7533           | 1.0978           | 0.1102     |
| <i>df = 179</i>                                            | <i>Limb Loss (Yes)</i>               | 1.0307           | 0.3843           | 0.0073 *   |
| <i>AIC: 230.89</i>                                         | <i>Sex (Male) :Hematodinium spp.</i> | -3.8199          | 1.6371           | 0.0196 *   |

657 \* Asterisk denotes significance ( $\alpha \leq 0.05$ ).

658 **Table 4.** Binomial logistic regression Model 2, reduced from the full, main effects model  
659 (Table S2, Model S4), used to explain the effects of sex on the presence of *Hematodinium*  
660 spp. in 2011.

661

| <b>Model</b>                   | <b>Predictor variable</b> | <b>Estimate (slope)</b> | <b>± Standard Error</b> | <b>P value</b> |
|--------------------------------|---------------------------|-------------------------|-------------------------|----------------|
| <i>Hematodinium spp. ~ Sex</i> |                           |                         |                         |                |
| <i>df = 182</i>                | <i>Sex (Male)</i>         | -1.3236                 | 0.7309                  | 0.0702         |
| <i>AIC: 66.714</i>             |                           |                         |                         |                |

662

663 **Table 5.** Binomial logistic regression Model 3, reduced from the full, main effects model  
664 (Table S2, Model S6), used to explain the effects of landing size on the presence of injury in  
665 2011.  
666

| Model                        | Predictor variable                | Estimate<br>(slope) | $\pm$<br>Standard<br>Error | P value  |
|------------------------------|-----------------------------------|---------------------|----------------------------|----------|
| <i>Injury ~ Landing Size</i> |                                   |                     |                            |          |
| <i>df = 182</i>              | <i>Landing size<br/>(&gt;MLS)</i> | -2.0458             | 1.0366                     | 0.0484 * |
| <i>AIC: 150.38</i>           |                                   |                     |                            |          |

667 \* Asterisk denotes significance ( $\alpha \leq 0.05$ ).
